# Supplementary material
Source: Atypon-hosted journal article supplement (https://532.library.nashville.org/Record/CARL0000407489/DownloadSupplementalFile?fileId=107)
Supplement: DownloadSupplementalFile [file DownloadSupplementalFile]

## Taylor Roofing Company Records, c. 1921-1931

### Collection Summary

**Creator:** Taylor Roofing Company

Marvin W. Wiles / Wiles Photographers

**Title:** Taylor Roofing Company Records, c. 1921-1931

**Inclusive Dates:** c. 1921-1931, bulk 1926-1929

**Summary/Abstract:** The Taylor Roofing Company Records is a small collection of photographs and copy photographs of customer testimonial letters (approximately 44 items total) that provide a brief history of this local business and a snapshot of life in Nashville in the middle 1920s. Photographs of local residences and other buildings are included in the collection. Customer testimonial letters provide further documentation of local community members, businesses, residences, and organizations. Businesses and organizations that used the company's services during this time period include the Fisk Model Training School, the Phillips Chapel Colored Methodist Episcopal Church, Hooser's Pharmacy, Beasley's Corner Grocery, and the Tennessee State Fairgrounds, among others. Evidence of changes in roofing and building practices during this time period are also seen; the transition away from wooden shingles and toward the use of asphalt and slate-surfaced asphalt shingles are noteworthy given the devastating impact of the 1916 East Nashville fire.

**Physical Description/Extent:** .50 linear ft.

**Series:** Taylor Roofing Company, Book 1; Taylor Roofing Company, Book 2

**Accession Number:** RT-100

**Language:** English

**Stack Location:** R3, S3 (Note: Items are housed in a one half of a letter-size document case along with the Jersey Farms Milk Service Photographs.)

**Repository:** Special Collections Division, Nashville Public Library, 615 Church Street, Nashville, TN 37219

### Biographical/Historical Sketch

The Taylor Roofing Company was a Nashville business operating in the early to middle twentieth century. Resources on the history of the Taylor Roofing Company are limited, however, a search of city directories revealed advertisements and/or listings for the Taylor Roofing Company beginning in circa 1920. Prior to 1920, Leon Taylor is listed as a vice president and later president of the Uncle Hiram Roofing and Paving Company circa 1916 to 1918.

A small number of Nashville residences, businesses, and organizations served by Taylor Roofing Company in the middle 1920s are documented in this collection. Businesses and organizations that used the company's services during this time period include the Fisk Model Training School, the Phillips Chapel Colored Methodist Episcopal Church, Hooser's Pharmacy, Beasley's Corner Grocery, and the Tennessee State Fairgrounds, among others. Evidence of changes in roofing and building practices during this time period are also seen; the transition away from wooden shingles and toward the use of

asphalt and slate-surfaced asphalt shingles are noteworthy given the devastating impact of the 1916 East Nashville fire.

### **Scope and Contents of the Collection**

The Taylor Roofing Company Records is a small collection of photographs and copy photographs of customer testimonial letters (approximately 44 items total) that provide a brief history of this local business and a snapshot of life in Nashville in the middle 1920s. Photographs of local residences and other buildings are included in the collection. Customer testimonial letters provide further documentation of local community members, businesses, residences, and organizations.

The collection items were originally loosely-bound in two separate photo albums containing photographs and copy photographs mounted on linen support. The albums were likely used by the Taylor Roofing Company for sales and promotional purposes, and demonstrate the importance of customer testimonials and referrals for local businesses during this time period.

The inside cover of the first book (Book 1) was embossed with text that read “Taylor Roofing Company, Nashville, Tenn. Reward When Returned”, indicating the value of these materials to the company. It is likely that Book 1 may have been a book of master photographs to be re-used by the company as needed since these photographs are identified with local photographer Marvin W. Wiles’ signature label.

Some items in this collection serve as a reminder of the hazards caused by the use of wooden shingles during a time when many homes were heated by wood and coal-burning fire places. One item is a composite photograph of four images originating from sources like the National Fire Prevention Association. In this composite photograph, home and business owners are warned of “the menace of the wooden shingle” (Book 2, Item 4). Given the devastation wrought by the East Nashville fire of 1916, it is not surprising that in this collection we see evidence of local residents, businesses and churches moving to replace fire-prone or leaky shingles with the kind offered by this local business.

### **Organization/Arrangement of Materials**

The collection is housed in one half of a letter-size document case; the items are divided within the box as they originally appeared in two separate, loosely-bound photograph albums. A number of the homes or buildings remain unidentified; some images are duplicates.

### **Restrictions**

**Restrictions on Access:** In library use only. Available by appointment.

**Restrictions on Use and Reproduction:** Some items may be protected by copyright law (Title 17 U.S. Code).

### **Index Terms**

**Personal Names:**

Taylor, Leon  
Wiles, Marvin W.

**Corporate Names/Organizations:**

Colored Methodist Episcopal Church  
Eastman Hotel  
Fisk University  
Methodist Episcopal Church, South  
Taylor Roofing Company  
Wiles Photographers

**Subjects:**

Building materials  
Buildings—Tennessee—Nashville  
Business—Tennessee—Nashville—History—Sources  
Church buildings—Tennessee—Nashville  
Dwellings—Tennessee—Nashville  
History—20<sup>th</sup> century—Tennessee—Nashville  
Labor—Tennessee—Nashville—History—20<sup>th</sup> century—Sources  
Roofing  
Roofs  
Roofs—Fires and fire prevention  
Working class—Tennessee—Nashville

**Places:**

Nashville (Tenn.)—Buildings, structures, etc.  
Nashville (Tenn.)—Commerce  
Nashville (Tenn.)—History—Sources  
Hot Springs (Ark.)—Buildings, structures, etc.  
Hot Springs (Ark.)—History—Sources

**Genre/Document Types:**

Black-and-white photographs, aat  
Blueprints, aat  
Documents, aat  
Photographs, aat

**Occupations:**

Roofing—Installation, lcsh

**Administrative Information**

**Copyright:** This material may be protected by copyright law (Title 17 U.S. Code).

**Preferred Citation:** Taylor Roofing Company, Special Collections Division, Nashville Public Library.

**Immediate Source of Acquisition:** Unknown

**Ownership and Custodial History:** Unknown

**Processing Information:** This collection was processed by Tracey Howerton, September-November 2012, with assistance from volunteer Marty O'Reilly.

**Accruals:** No further accruals are expected.

**References to Works by or about Collection Creator/Topic**

Cohen, Rodney T. *Fisk University*. Charleston, S.C.: Arcadia Press, 2001.

Nashville City Directories

**Detailed Description of the Collection**

**SERIES I. TAYLOR ROOFING COMPANY, BOOK 1**

**Container List**

| Item No. | Description of item                   | Date          | Name, Affiliation                                                                                       |              | Addresses                             |
|----------|---------------------------------------|---------------|---------------------------------------------------------------------------------------------------------|--------------|---------------------------------------|
| Item 1   | Copy photograph of testimonial letter | Jan. 16, 1929 | Alfred, H. A.                                                                                           | Residence    | 709 25 <sup>th</sup> Avenue North     |
| Item 2   | Copy photograph of testimonial letter | Dec. 16, 1926 | Hooser, W. E.                                                                                           | Residence    | 2400 Capers Avenue                    |
|          |                                       |               | Hooser's Pharmacy                                                                                       | Business     | 14 <sup>th</sup> and Woodland Streets |
| Item 3   | Copy photograph of testimonial letter | Sept. 1, 1926 | Carter, Cullen T.                                                                                       | Residence    | 2400 Pierce Ave.                      |
|          |                                       |               | Conference Superintendent, Sunday School Board, Tennessee Conference, Methodist Episcopal Church, South | Organization | 810 Broadway                          |
| Item 4   | Copy photograph of                    | Dec. 8, 1926  | Beasley, R. C.                                                                                          | Residence    | 1009 Grove Avenue                     |

|         |                                                   |               |                                                    |                               |                                     |
|---------|---------------------------------------------------|---------------|----------------------------------------------------|-------------------------------|-------------------------------------|
|         | testimonial letter                                |               |                                                    |                               |                                     |
|         |                                                   |               | Beasley's Corner Grocery                           | Business                      | 900 Acklen Avenue                   |
| Item 5  | Copy photograph of testimonial letter             | Dec. 10, 1926 | Coleman, P. J.                                     | Residence                     | 69 Wharf Avenue                     |
|         |                                                   |               | Phillips Chapel Colored Methodist Episcopal Church | Church                        | 86 Wharf Avenue                     |
| Item 6  | Copy photograph of testimonial letter             | Dec. 12, 1926 | Sparks, C.                                         | Residence                     | 915 Chicamauga Avenue               |
|         |                                                   |               | President, Nashville Pottery Company               | Business                      | [ 844 ] Cleveland Street Viaduct    |
| Item 7  | Copy photograph of letter re: guarantee           | May 4, 1924   | Becker Asphaltum Roofing Company                   | Business                      | n/a                                 |
| Item 8  | Copy photograph of guarantee policy               | Undated       | Becker Asphaltum Roofing Company                   | Business                      | n/a                                 |
| Item 9  | Photograph of damaged wooden shingle roof         | Undated       | Campion, John                                      | Residence                     | [323] 22 <sup>nd</sup> Avenue North |
| Item 10 | Photograph of section of roof with new shingles   | Undated       | Johnson home                                       | Residence – roof only         | Murfreesboro Pike                   |
| Item 11 | Photograph showing new roof                       | Undated       | Johnson home                                       | Residence – full view of home | Murfreesboro Pike                   |
| Item 12 | Photograph showing new roof                       | Undated       | Campion, John                                      | Residence                     | [323] 22 <sup>nd</sup> Avenue North |
| Item 13 | Photograph of bungalow-style home w/ new shingles | Undated       | Unidentified                                       | Residence                     | Unidentified                        |
| Item    | Photograph                                        | Undated       | Unidentified                                       | Residence                     | Unidentified                        |

|         |                                                                                                             |         |              |           |                      |
|---------|-------------------------------------------------------------------------------------------------------------|---------|--------------|-----------|----------------------|
| 14      | of bungalow-style home w/ new shingles                                                                      |         |              |           |                      |
| Item 15 | Photograph of three men installing new roof                                                                 | Undated | Unidentified | Residence | Unidentified         |
| Item 16 | Photograph of home with new roof                                                                            | Undated | Unidentified | Residence | Unidentified         |
| Item 17 | Photograph of house on corner of residential intersection. City street and sidewalks visible.               | Undated | Unidentified | Residence | Unidentified         |
| Item 18 | Photograph of two-and-one-half story house, number "1503" visible over front door. Columned front entrance. | Undated | Unidentified | Residence | [1503?] Unidentified |
| Item 19 | Photograph of bungalow-style house; "3615" visible as address. Sidewalk visible in front.                   | Undated | Unidentified | Residence | [3615] Unidentified  |
| Item 20 | Photograph of one-and-one half story house w/ wrap-around porch. Sidewalk and street visible.               | Undated | Unidentified | Residence | [1200?] Unidentified |

|         |                                      |         |                                                            |              |                                       |
|---------|--------------------------------------|---------|------------------------------------------------------------|--------------|---------------------------------------|
| Item 21 | Photograph                           | Undated | Trabue, Charles C., Sr.                                    | Residence    | Bonaventure, 4815 Harding Road        |
| Item 22 | Photograph                           | Undated | Fisk Model Training School building                        | Organization | Unidentified [Fisk University campus] |
| Item 23 | Photograph of fire-damaged home      | Undated | Unidentified                                               | Residence    | Unidentified                          |
| Item 24 | Photograph of two fire-damaged homes | Undated | Unidentified                                               | Residence    | [1807?] Unidentified                  |
| Item 25 | Photograph                           | Undated | Tennessee State Fairgrounds, Women's Building (background) | Organization | Tennessee State Fairgrounds           |
| Item 26 | Photograph of house needing new roof | Undated | Unidentified                                               | Residence    | Unidentified                          |
| Item 27 | Photograph of house with new roof    | Undated | Unidentified                                               | Residence    | Unidentified                          |

## **SERIES II. TAYLOR ROOFING COMPANY, BOOK 2**

### **Container List**

| <b>Item No.</b> | <b>Description of item</b>                 | <b>Date</b> | <b>Name, Affiliation</b> |            | <b>Addresses</b>                    |
|-----------------|--------------------------------------------|-------------|--------------------------|------------|-------------------------------------|
| Item 1          | Photograph (duplicate)                     | Undated     | Johnson home             | Residence  | Murfreesboro Pike                   |
| Item 2          | Photograph (duplicate)                     | Undated     | Johnson home             | Residence  | Murfreesboro Pike                   |
| Item 3          | Photograph (duplicate)                     | Undated     | Campion, John            | Residence  | [323] 22 <sup>nd</sup> Avenue North |
| Item 4          | Composite photograph—"evil wooden shingle" | Undated     | n/a                      | Residences | n/a                                 |

|         |                                                                                 |               |                                          |              |                                         |
|---------|---------------------------------------------------------------------------------|---------------|------------------------------------------|--------------|-----------------------------------------|
| Item 5  | Photograph (duplicate)                                                          | Undated       | Johnson home                             | Residence    | Murfreesboro Pike                       |
| Item 6  | Copy photograph of directions for laying asphalt shingles                       | Undated       | n/a                                      | Residences   | n/a                                     |
| Item 7  | Copy photograph of section of advertisement for the Barrett Company, N.Y., N.Y. | Undated       | Barrett Company, N.Y., N.Y.              | Business     | n/a                                     |
| Item 8  | Photograph of Eastman Hotel (Note: see telegram – Item 11)                      | Undated       | Eastman Hotel                            | Business     | Hot Springs, Arkansas                   |
| Item 9  | Copy photograph of letter of inquiry for roofing repair to new house            | July 15, 1931 | A. Horne                                 | Residence    | Dickson, Tenn.                          |
|         |                                                                                 |               | Dickson Planing Mill Company             | Business     | Dickson, Tenn.                          |
| Item 10 | Copy photograph of letter of satisfaction with “ever lock” shingles             | Feb. 11, 1929 | Martin Johnson, Asst. to Vice-Chancellor | Organization | University of the South, Sewanee, Tenn. |
| Item 11 | Copy photograph of telegram                                                     | Dec. 1921 (?) | J. M. Williams                           | Business     | Eastman Hotel                           |
| Item 12 | Copy photograph of testimonial letter (duplicate)                               | Dec. 16, 1926 | C. Sparks                                | Residence    | 915 Chicamauga Ave.                     |
|         |                                                                                 |               | President, Nashville Pottery Company     | Business     | [ 844 ] Cleveland Street Viaduct        |

|         |                                                                                                                         |               |               |           |                                   |
|---------|-------------------------------------------------------------------------------------------------------------------------|---------------|---------------|-----------|-----------------------------------|
| Item 13 | Copy photograph of testimonial letter (duplicate)                                                                       | Jan. 16, 1929 | Alfred, H. A. | Residence | 709 25 <sup>th</sup> Avenue North |
| Item 14 | Copy photograph of testimonial letter re: rental house in Chattanooga, and displeasure with Genasco's Lay Tite shingles | Feb. 16, 1929 | W. L. Acuff   | Residence | 347 22 <sup>nd</sup> Ave. N.      |
| Item 15 | Photocopy of Taylor Roofing Company Everlox Shingle Guarantee and Maintenance Agreement                                 | Undated       | n/a           | n/a       | n/a                               |
| Item 16 | Small blueprint of installation instructions - detail of valley construction (approx. 6 x 7")                           | Undated       | n/a           | n/a       | n/a                               |
| Item 17 | Small blueprint of installation instructions - detail of starter strip (approx. 6 x 7")                                 | Undated       | n/a           | n/a       | n/a                               |
